# Supplementary material for: Landscape analysis of alternative splicing in kidney renal clear cell carcinoma and their clinical significance
Source: publisher site journal article supplement (doi:10.18632/aging.205915), 2024-06-10
Supplement: Supplementary file [file aging-v16i11-205915-supplementary-material-SD1.pdf]

## SUPPLEMENTARY TABLES

**Supplementary Table 1. Univariate Cox regression analysis of 30 prognosis-associated SFs in KIRC.**

| Gene      | HR          | Z            | p-value     | Lower       | Upper       |
|-----------|-------------|--------------|-------------|-------------|-------------|
| FMR1      | 0.621467917 | -2.732589657 | 0.006283857 | 0.441821883 | 0.874158538 |
| SRSF11    | 1.685010272 | 3.632577011  | 0.000280605 | 1.271565409 | 2.232885227 |
| HNRNPL    | 4.007894656 | 3.844879191  | 0.000120612 | 1.975031114 | 8.133147602 |
| HNRNPU    | 0.514504213 | -3.357625669 | 0.00078615  | 0.349073214 | 0.758335429 |
| HNRNPM    | 0.556213478 | -3.307673673 | 0.000940744 | 0.392901976 | 0.78740615  |
| HNRNPF    | 0.609952908 | -2.425104282 | 0.01530399  | 0.409047036 | 0.909534888 |
| RBF0X2    | 0.692545956 | -2.488846599 | 0.012815825 | 0.518563616 | 0.924900796 |
| SF1       | 0.634492442 | -2.465594068 | 0.013678625 | 0.441946981 | 0.910925238 |
| DAZAP1    | 2.954170151 | 5.746926637  | 9.09E-09    | 2.04171703  | 4.274402943 |
| HNRNPH2   | 0.567871474 | -2.84005707  | 0.004510546 | 0.384285946 | 0.839161604 |
| HNRNPA0   | 0.477406745 | -3.581171098 | 0.000342058 | 0.318526256 | 0.715536619 |
| NOVA2     | 0.772336454 | -3.713899717 | 0.00020409  | 0.673903698 | 0.885146646 |
| TRA2A     | 2.282696947 | 5.001379783  | 5.69E-07    | 1.651877685 | 3.154413548 |
| RBM5      | 1.497541895 | 3.025403637  | 0.002483015 | 1.152821971 | 1.945340898 |
| RBM4      | 0.581450677 | -2.257988013 | 0.023946407 | 0.363167429 | 0.930933952 |
| RBMX      | 0.473821151 | -3.514962026 | 0.000439817 | 0.312417321 | 0.71861087  |
| KHDRBS1   | 0.436892796 | -4.195827154 | 2.72E-05    | 0.296746777 | 0.643226246 |
| KHDRBS3   | 0.673100149 | -4.188333841 | 2.81E-05    | 0.559278616 | 0.810086059 |
| KHDRBS2   | 1.12877534  | 2.156502266  | 0.031044467 | 1.01110095  | 1.260144963 |
| SRSF4     | 2.198858748 | 3.49531939   | 0.000473495 | 1.413558342 | 3.420431722 |
| SRSF7     | 2.195549812 | 3.600427916  | 0.000317694 | 1.430926947 | 3.368752673 |
| SRSF6     | 1.406302941 | 2.136616065  | 0.032629232 | 1.0285915   | 1.922714667 |
| SRSF1     | 2.321532401 | 2.906359483  | 0.003656611 | 1.315548722 | 4.096779236 |
| SRSF3     | 0.570910124 | -2.194755494 | 0.028181142 | 0.346080788 | 0.941798508 |
| ZRANB2    | 1.741171224 | 3.581635277  | 0.00034145  | 1.285425047 | 2.358501757 |
| ELAVL2    | 0.841793727 | -3.315809252 | 0.000913782 | 0.760317542 | 0.93200096  |
| HNRNPA2B1 | 3.20577654  | 4.615325615  | 3.92E-06    | 1.954706074 | 5.257569596 |
| PCBP1     | 0.741119454 | -3.985142818 | 6.74E-05    | 0.639583023 | 0.858775211 |
| HNRNPLL   | 0.581399495 | -3.05077438  | 0.00228252  | 0.410357007 | 0.823734862 |
| TIA1      | 1.809131386 | 4.769843249  | 1.84E-06    | 1.417991835 | 2.308163059 |

**Supplementary Table 3. Clinicopathological characteristics of ten KIRC samples.**

| <b>Sample</b> | <b>Age</b> | <b>Gender</b> | <b>Grade</b> | <b>Stage</b> |
|---------------|------------|---------------|--------------|--------------|
| 1             | 54         | Female        | 3            | I            |
| 2             | 56         | Male          | 3            | III          |
| 3             | 62         | Male          | 3            | II           |
| 4             | 59         | Male          | 3            | I            |
| 5             | 72         | Male          | 2            | I            |
| 6             | 65         | Female        | 2            | I            |
| 7             | 57         | Male          | 2            | II           |
| 8             | 46         | Male          | 2            | II           |
| 9             | 84         | Female        | 2            | I            |
| 10            | 56         | Male          | 2            | I            |
