# Supplementary material for: Landscape analysis of alternative splicing in kidney renal clear cell carcinoma and their clinical significance
Source: Aging (Albany NY). 2024 Jun 10;16(11):10016–32. doi: 10.18632/aging.205915 (PMC11210227; doi:10.18632/aging.205915)
Supplement: Supplementary Table 2 [file aging-16-205915-s002.xlsx]

## Sheet: Supplementary Table 2
Supplementary Table 2. Correlation analysis of prognostic-associated AS events and prognostic-associated SFs.
GENE1	AS events	GENE2	P	R
SLC35E2	AT	RBFOX2	0	-0.503955
SLC35E2	AT	RBFOX2	0	0.503094
THAP3	AT	QKI	0	-0.569116
THAP3	AT	HNRNPF	0	-0.501045
THAP3	AT	RBFOX2	0	-0.524578
THAP3	AT	KHDRBS1	0	-0.515624
THAP3	AT	QKI	0	0.569116
THAP3	AT	HNRNPF	0	0.501045
THAP3	AT	RBFOX2	0	0.524578
THAP3	AT	KHDRBS1	0	0.515624
EXOSC10	ES	QKI	0	-0.538075
EXOSC10	ES	HNRNPF	0	-0.51414
EXOSC10	ES	HNRNPH2	0	-0.512505
NIPAL3	AT	RBFOX2	0	-0.583951
NIPAL3	AT	QKI	0	0.51979
NIPAL3	AT	RBFOX2	0	0.600172
NIPAL3	AT	PCBP1	0	0.509007
ZBTB8OS	AT	RBFOX2	0	0.527991
ZBTB8OS	AT	RBFOX2	0	-0.527992
ZSCAN20	AT	QKI	0	-0.500733
ZSCAN20	AT	QKI	0	0.500733
LEPR	AT	QKI	0	0.505358
LEPR	AT	QKI	0	-0.507624
PRKACB	AT	RBFOX2	0	0.521874
PRKACB	AT	RBFOX2	0	-0.521868
TGFBR3	AP	QKI	0	0.529585
TGFBR3	AP	HNRNPM	0	0.506378
TGFBR3	ES	QKI	0	-0.520659
SLC30A7	AT	QKI	0	0.520408
SLC30A7	AT	RBFOX2	0	0.512676
SLC30A7	AT	QKI	0	-0.520414
SLC30A7	AT	RBFOX2	0	-0.512675
TAF13	AT	QKI	0	-0.568468
TAF13	AT	SYNCRIP	0	-0.530323
TAF13	AT	HNRNPU	0	-0.519409
TAF13	AT	RBFOX2	0	-0.586507
TAF13	AT	QKI	0	0.568466
TAF13	AT	SYNCRIP	0	0.530317
TAF13	AT	HNRNPU	0	0.5194
TAF13	AT	RBFOX2	0	0.58651
RBM15	AT	QKI	0	0.600768
RBM15	AT	SYNCRIP	0	0.536936
RBM15	AT	FMR1	0	0.554259
RBM15	AT	RBFOX2	0	0.563591
RBM15	AT	HNRNPLL	0	0.500156
RBM15	AT	QKI	0	-0.600768
RBM15	AT	SYNCRIP	0	-0.536936
RBM15	AT	FMR1	0	-0.554259
RBM15	AT	RBFOX2	0	-0.563591
RBM15	AT	HNRNPLL	0	-0.500156
CD58	AT	SF1	0	-0.536122
ENSA	AT	HNRNPH2	0	0.557622
ENSA	AT	HNRNPLL	0	0.530726
ARNT	ES	HNRNPF	0	-0.503688
ASH1L	ES	QKI	0	-0.626369
ASH1L	ES	SYNCRIP	0	-0.572937
ASH1L	ES	HNRNPU	0	-0.554534
ASH1L	ES	HNRNPF	0	-0.521901
ASH1L	ES	RBFOX2	0	-0.526062
ASH1L	ES	KHDRBS1	0	-0.534202
YY1AP1	RI	PCBP1	0	-0.504697
F11R	AP	QKI	0	-0.526998
F11R	AP	QKI	0	0.523628
NIT1	AT	SF1	0	0.554933
NIT1	AT	HNRNPDL	0	0.516276
NIT1	AT	SF1	0	-0.554918
NIT1	AT	HNRNPDL	0	-0.516277
TROVE2	AT	QKI	0	0.630704
TROVE2	AT	SYNCRIP	0	0.56644
TROVE2	AT	FMR1	0	0.511112
TROVE2	AT	HNRNPU	0	0.523125
TROVE2	AT	HNRNPF	0	0.501737
TROVE2	AT	RBFOX2	0	0.635825
TROVE2	AT	SF1	0	0.50241
TROVE2	AT	KHDRBS1	0	0.520657
TROVE2	AT	QKI	0	-0.630704
TROVE2	AT	SYNCRIP	0	-0.56644
TROVE2	AT	FMR1	0	-0.511112
TROVE2	AT	HNRNPU	0	-0.523125
TROVE2	AT	HNRNPF	0	-0.501737
TROVE2	AT	RBFOX2	0	-0.635825
TROVE2	AT	SF1	0	-0.50241
TROVE2	AT	KHDRBS1	0	-0.520657
KDM5B	ES	QKI	0	-0.539922
AIDA	AP	KHDRBS1	0	0.53387
AIDA	AP	PCBP1	0	0.557805
AIDA	AP	KHDRBS1	0	-0.533871
AIDA	AP	PCBP1	0	-0.557759
TP53BP2	ES	QKI	0	-0.544747
TP53BP2	ES	SYNCRIP	0	-0.510428
TP53BP2	ES	HNRNPF	0	-0.526107
TTC13	ME	QKI	0	0.511997
SPRTN	RI	RBFOX2	0	-0.516304
SPRTN	RI	PCBP1	0	-0.534409
DISC1	AT	QKI	0	0.522562
B3GALNT2	AT	QKI	0	0.511896
B3GALNT2	AT	QKI	0	-0.511886
ZNF124	AT	QKI	0	0.589267
ZNF124	AT	SYNCRIP	0	0.516329
ZNF124	AT	HNRNPU	0	0.510064
ZNF124	AT	HNRNPF	0	0.500626
ZNF124	AT	RBFOX2	0	0.503863
ZNF124	AT	KHDRBS1	0	0.526545
ZNF124	AT	HNRNPLL	0	0.508591
HSPA14	AT	QKI	0	-0.573633
HSPA14	AT	SYNCRIP	0	-0.506147
HSPA14	AT	RBFOX2	0	-0.601445
HSPA14	AT	KHDRBS1	0	-0.502692
HSPA14	AT	QKI	0	0.573629
HSPA14	AT	SYNCRIP	0	0.506141
HSPA14	AT	RBFOX2	0	0.601437
HSPA14	AT	KHDRBS1	0	0.502689
KIAA1217	AP	NOVA2	0	0.544813
YME1L1	AA	QKI	0	-0.569238
YME1L1	AA	SYNCRIP	0	-0.504635
YME1L1	AA	RBFOX2	0	-0.560094
YME1L1	AA	KHDRBS1	0	-0.501723
ZEB1	ES	KHDRBS1	0	-0.508531
ZEB1	ES	PCBP1	0	-0.512713
NRP1	AT	QKI	0	0.548584
PARD3	AT	QKI	0	0.520893
CREM	AP	NOVA2	0	0.533815
JMJD1C	AP	QKI	0	0.526382
JMJD1C	AP	QKI	0	-0.526174
MRPS16	AT	QKI	0	0.512981
MRPS16	AT	RBFOX2	0	0.546232
MRPS16	AT	SF1	0	0.501678
MRPS16	AT	QKI	0	-0.512981
MRPS16	AT	RBFOX2	0	-0.546232
MRPS16	AT	SF1	0	-0.501678
COX15	AT	QKI	0	0.588582
COX15	AT	SYNCRIP	0	0.517084
COX15	AT	FMR1	0	0.514907
COX15	AT	HNRNPF	0	0.504685
COX15	AT	RBFOX2	0	0.584903
COX15	AT	SF1	0	0.524841
COX15	AT	QKI	0	-0.588582
COX15	AT	SYNCRIP	0	-0.517084
COX15	AT	FMR1	0	-0.514907
COX15	AT	HNRNPF	0	-0.504685
COX15	AT	RBFOX2	0	-0.584903
COX15	AT	SF1	0	-0.524841
FAM178A	AT	QKI	0	-0.551688
INPP5F	RI	QKI	0	-0.589655
INPP5F	RI	SYNCRIP	0	-0.52137
INPP5F	RI	HNRNPU	0	-0.504519
INPP5F	RI	RBFOX2	0	-0.598903
INPP5F	RI	KHDRBS1	0	-0.500671
TACC2	ES	HNRNPH2	0	-0.505044
TUBGCP2	AP	RBFOX2	0	-0.506507
TUBGCP2	AP	QKI	0	0.514361
TUBGCP2	AP	SYNCRIP	0	0.507635
TUBGCP2	AP	HNRNPU	0	0.520537
TUBGCP2	AP	HNRNPF	0	0.537982
TUBGCP2	AP	HNRNPH2	0	0.52004
TUBGCP2	AP	KHDRBS1	0	0.500165
ZNF143	AP	QKI	0	-0.541572
ZNF143	AP	QKI	0	0.537472
MICAL2	AT	QKI	0	0.544113
MICAL2	AT	RBFOX2	0	0.517289
MICAL2	AT	QKI	0	-0.532259
MICAL2	AT	RBFOX2	0	-0.508325
PSMA1	AT	QKI	0	0.605595
PSMA1	AT	SYNCRIP	0	0.549563
PSMA1	AT	FMR1	0	0.540886
PSMA1	AT	HNRNPU	0	0.536224
PSMA1	AT	HNRNPM	0	0.511437
PSMA1	AT	HNRNPF	0	0.543494
PSMA1	AT	RBFOX2	0	0.594477
PSMA1	AT	HNRNPH2	0	0.513491
PSMA1	AT	KHDRBS1	0	0.505336
PSMA1	AT	HNRNPLL	0	0.529626
PSMA1	AT	QKI	0	-0.605592
PSMA1	AT	SYNCRIP	0	-0.549555
PSMA1	AT	FMR1	0	-0.540875
PSMA1	AT	HNRNPU	0	-0.536218
PSMA1	AT	HNRNPM	0	-0.511436
PSMA1	AT	HNRNPF	0	-0.543481
PSMA1	AT	RBFOX2	0	-0.594479
PSMA1	AT	HNRNPH2	0	-0.513488
PSMA1	AT	KHDRBS1	0	-0.505331
PSMA1	AT	HNRNPLL	0	-0.529627
PLEKHA7	AT	PCBP1	0	-0.543578
PLEKHA7	AT	PCBP1	0	0.543578
GTF2H1	AP	HNRNPF	0	0.531062
GTF2H1	AP	QKI	0	-0.536515
GTF2H1	AP	HNRNPF	0	-0.538699
QSER1	AP	QKI	0	0.543683
QSER1	AP	HNRNPF	0	0.503152
QSER1	AP	QKI	0	-0.527984
FBXO3	RI	HNRNPH2	0	-0.512771
FBXO3	RI	PCBP1	0	-0.514034
DGKZ	AP	NOVA2	0	-0.604919
DGKZ	AP	NOVA2	0	0.614891
NUP160	RI	QKI	0	-0.573004
NUP160	RI	RBFOX2	0	-0.516615
FADS1	AP	QKI	0	-0.526135
FADS1	AP	HNRNPF	0	-0.52554
FADS1	AP	QKI	0	0.514695
FADS1	AP	HNRNPF	0	0.529183
SUV420H1	AT	QKI	0	-0.542196
SUV420H1	AT	RBFOX2	0	-0.520775
SUV420H1	AT	QKI	0	0.542196
SUV420H1	AT	RBFOX2	0	0.520775
ARAP1	AP	RBFOX2	0	0.51476
ATG16L2	AT	QKI	0	-0.593798
ATG16L2	AT	SYNCRIP	0	-0.518047
ATG16L2	AT	QKI	0	0.593793
ATG16L2	AT	SYNCRIP	0	0.518037
CLNS1A	AT	SF1	0	0.50695
CLNS1A	AT	SF1	0	-0.50695
CEP57	RI	QKI	0	-0.511106
CEP57	RI	KHDRBS1	0	-0.526274
PIH1D2	AT	RBFOX2	0	-0.502972
PIH1D2	AT	SF1	0	-0.506136
C11orf57	RI	QKI	0	-0.534601
RBM7	RI	QKI	0	-0.558504
RBM7	RI	HNRNPF	0	-0.50761
RBM7	RI	KHDRBS1	0	-0.510332
MPZL2	AT	QKI	0	0.611638
MPZL2	AT	SYNCRIP	0	0.501349
MPZL2	AT	KHDRBS1	0	0.568833
MPZL2	AT	QKI	0	-0.611636
MPZL2	AT	SYNCRIP	0	-0.501356
MPZL2	AT	KHDRBS1	0	-0.568836
ETS1	AP	NOVA2	0	0.520195
ETS1	AP	NOVA2	0	-0.518959
APOLD1	AT	NOVA2	0	0.667318
APOLD1	AT	ELAVL2	0	0.52311
APOLD1	AT	NOVA2	0	-0.667318
APOLD1	AT	ELAVL2	0	-0.52311
LYRM5	AT	QKI	0	0.610606
LYRM5	AT	SYNCRIP	0	0.565209
LYRM5	AT	HNRNPU	0	0.531108
LYRM5	AT	HNRNPM	0	0.52577
LYRM5	AT	HNRNPF	0	0.532404
LYRM5	AT	RBFOX2	0	0.632776
LYRM5	AT	SF1	0	0.560458
LYRM5	AT	TRA2B	0	0.519174
LYRM5	AT	HNRNPLL	0	0.539111
LYRM5	AT	QKI	0	-0.610606
LYRM5	AT	SYNCRIP	0	-0.565195
LYRM5	AT	HNRNPU	0	-0.531095
LYRM5	AT	HNRNPM	0	-0.525765
LYRM5	AT	HNRNPF	0	-0.532388
LYRM5	AT	RBFOX2	0	-0.632781
LYRM5	AT	SF1	0	-0.560444
LYRM5	AT	TRA2B	0	-0.519159
LYRM5	AT	HNRNPLL	0	-0.539098
SCAF11	AP	HNRNPF	0	-0.541865
SCAF11	AP	PCBP1	0	-0.510741
SCAF11	AP	QKI	0	0.528313
SCAF11	AP	SYNCRIP	0	0.517496
SCAF11	AP	HNRNPU	0	0.505967
SCAF11	AP	HNRNPF	0	0.540667
SCAF11	AP	KHDRBS1	0	0.504974
ADCY6	AP	HNRNPM	0	-0.513578
ADCY6	AP	HNRNPA0	0	-0.527497
ADCY6	AP	PCBP1	0	-0.510935
ADCY6	AP	HNRNPM	0	0.511405
ADCY6	AP	HNRNPA0	0	0.525974
ADCY6	AP	PCBP1	0	0.508058
PRPF40B	AA	NOVA2	0	-0.528644
ATF7	AT	QKI	0	0.586087
ATF7	AT	RBFOX2	0	0.576722
ATF7	AT	KHDRBS1	0	0.532503
ATF7	AT	PCBP1	0	0.502454
ERBB3	AP	PCBP1	0	0.50249
ERBB3	AP	PCBP1	0	-0.50398
SRGAP1	AP	QKI	0	-0.518012
SRGAP1	AP	QKI	0	0.518364
THAP2	AT	QKI	0	-0.526584
THAP2	AT	QKI	0	0.526584
GALNT4	AP	QKI	0	0.503668
GALNT4	AP	QKI	0	-0.503559
CDK17	AT	RBFOX2	0	0.500582
CDK17	AT	RBFOX2	0	-0.500582
RIC8B	AP	QKI	0	-0.532163
RIC8B	AP	KHDRBS1	0	-0.510636
RIC8B	AP	QKI	0	0.531719
RIC8B	AP	KHDRBS1	0	0.510304
C12orf23	ES	QKI	0	-0.540166
C12orf23	ES	HNRNPF	0	-0.516947
UBE3B	AA	QKI	0	-0.520656
UBE3B	AA	RBFOX2	0	-0.5081
TCHP	AT	QKI	0	0.545424
TCHP	AT	HNRNPF	0	0.523699
TCHP	AT	RBFOX2	0	0.506432
TCHP	AT	QKI	0	-0.545424
TCHP	AT	HNRNPF	0	-0.523701
TCHP	AT	RBFOX2	0	-0.506421
GIT2	AA	QKI	0	-0.59052
GIT2	AA	SYNCRIP	0	-0.578347
GIT2	AA	HNRNPU	0	-0.542829
GIT2	AA	RBFOX2	0	-0.593469
GIT2	AA	HNRNPH2	0	-0.513466
GIT2	AA	KHDRBS1	0	-0.546457
GIT2	AA	PCBP1	0	-0.5343
GIT2	ES	QKI	0	-0.566433
GIT2	ES	SYNCRIP	0	-0.5419
GIT2	ES	RBFOX2	0	-0.567535
PPP1CC	AP	QKI	0	0.512177
PPP1CC	AP	HNRNPF	0	0.521955
PPP1CC	AP	QKI	0	-0.512177
PPP1CC	AP	HNRNPF	0	-0.521955
NAA25	ES	QKI	0	-0.52528
NAA25	ES	HNRNPF	0	-0.501305
TRAFD1	ES	QKI	0	-0.520758
TRAFD1	ES	HNRNPF	0	-0.511964
TAOK3	AP	PCBP1	0	0.511816
PXN	AP	NOVA2	0	0.601423
CAMKK2	AP	HNRNPA0	0	0.518815
ZCCHC8	AP	QKI	0	-0.526549
ZCCHC8	AP	HNRNPF	0	-0.518805
ZCCHC8	AP	HNRNPF	0	0.51674
MPHOSPH9	AT	QKI	0	-0.558234
MPHOSPH9	AT	FMR1	0	-0.520554
MPHOSPH9	AT	RBFOX2	0	-0.534892
MPHOSPH9	AT	HNRNPLL	0	-0.521534
MPHOSPH9	AT	QKI	0	0.558234
MPHOSPH9	AT	FMR1	0	0.520554
MPHOSPH9	AT	RBFOX2	0	0.534892
MPHOSPH9	AT	HNRNPLL	0	0.521534
FLT1	AT	NOVA2	0	-0.559659
FLT1	AT	NOVA2	0	0.555619
SERPINE3	AT	QKI	0	-0.527263
SERPINE3	AT	RBFOX2	0	-0.503815
SERPINE3	AT	QKI	0	0.527261
SERPINE3	AT	RBFOX2	0	0.503819
SLC7A7	AP	QKI	0	-0.61345
SLC7A7	AP	RBFOX2	0	-0.50032
SLC7A7	AP	QKI	0	0.613433
SLC7A7	AP	RBFOX2	0	0.500308
SEC23A	AP	QKI	0	-0.547056
SEC23A	AP	HNRNPM	0	-0.500562
SEC23A	AP	HNRNPF	0	-0.521166
SEC23A	AP	QKI	0	0.547056
SEC23A	AP	HNRNPM	0	0.500562
SEC23A	AP	HNRNPF	0	0.521166
KLHDC1	ES	KHDRBS1	0	-0.502369
NUMB	AP	QKI	0	0.531712
NUMB	AP	SYNCRIP	0	0.518175
NUMB	AP	HNRNPU	0	0.59319
NUMB	AP	HNRNPM	0	0.600782
NUMB	AP	HNRNPF	0	0.585447
NUMB	AP	RBFOX2	0	0.537021
NUMB	AP	HNRNPH2	0	0.617948
NUMB	AP	HNRNPA0	0	0.527972
NUMB	AP	TRA2B	0	0.504656
NUMB	AP	KHDRBS1	0	0.536746
NUMB	AP	PCBP1	0	0.550547
NUMB	AP	QKI	0	-0.531709
NUMB	AP	SYNCRIP	0	-0.518177
NUMB	AP	HNRNPU	0	-0.593194
NUMB	AP	HNRNPM	0	-0.600801
NUMB	AP	HNRNPF	0	-0.585441
NUMB	AP	RBFOX2	0	-0.537035
NUMB	AP	HNRNPH2	0	-0.617948
NUMB	AP	HNRNPA0	0	-0.527985
NUMB	AP	TRA2B	0	-0.50467
NUMB	AP	KHDRBS1	0	-0.53675
NUMB	AP	PCBP1	0	-0.550553
COQ6	AT	QKI	0	-0.532698
COQ6	AT	FMR1	0	-0.5009
COQ6	AT	RBFOX2	0	-0.56545
COQ6	AT	QKI	0	0.532712
COQ6	AT	FMR1	0	0.500916
COQ6	AT	RBFOX2	0	0.565455
ALDH6A1	AP	HNRNPH2	0	0.507248
ALDH6A1	AP	PCBP1	0	0.53406
ALDH6A1	AP	HNRNPH2	0	-0.507248
ALDH6A1	AP	PCBP1	0	-0.53406
FLVCR2	AT	RBFOX2	0	0.541458
FLVCR2	AT	RBFOX2	0	-0.541458
SLIRP	AT	QKI	0	0.632199
SLIRP	AT	SYNCRIP	0	0.522042
SLIRP	AT	HNRNPU	0	0.514028
SLIRP	AT	RBFOX2	0	0.619156
SLIRP	AT	SF1	0	0.512729
SLIRP	AT	HNRNPLL	0	0.507502
SLIRP	AT	QKI	0	-0.63137
SLIRP	AT	SYNCRIP	0	-0.522692
SLIRP	AT	HNRNPU	0	-0.515615
SLIRP	AT	RBFOX2	0	-0.624636
SLIRP	AT	SF1	0	-0.520956
SLIRP	AT	HNRNPLL	0	-0.507929
RPS6KA5	ES	QKI	0	-0.513089
DICER1	AP	QKI	0	0.550502
DICER1	AP	SYNCRIP	0	0.509267
DICER1	AP	HNRNPF	0	0.507901
PAPOLA	RI	QKI	0	-0.575734
PPP2R5C	AT	QKI	0	-0.560822
PPP2R5C	AT	RBFOX2	0	-0.588863
PPP2R5C	AT	QKI	0	0.657881
PPP2R5C	AT	SYNCRIP	0	0.579121
PPP2R5C	AT	RBFOX2	0	0.632389
PPP2R5C	AT	KHDRBS1	0	0.527408
KLC1	AT	RBFOX2	0	0.500343
NIPA1	AP	HNRNPF	0	0.556929
NIPA1	AP	PCBP1	0	0.509771
NIPA1	AP	HNRNPF	0	-0.528377
MTMR10	RI	QKI	0	-0.5615
MTMR10	RI	SYNCRIP	0	-0.520211
MTMR10	RI	HNRNPF	0	-0.530698
SNAPC5	AT	RBFOX2	0	-0.511218
SNAPC5	AT	RBFOX2	0	0.511219
CELF6	AT	QKI	0	-0.515357
CELF6	AT	QKI	0	0.514553
PML	AT	QKI	0	-0.515684
PML	AT	QKI	0	0.606815
PML	AT	SYNCRIP	0	0.519553
PML	AT	RBFOX2	0	0.563944
IREB2	RI	QKI	0	-0.53075
IREB2	RI	HNRNPF	0	-0.513969
HYKK	AT	FMR1	0	0.515654
TMED3	AT	QKI	0	-0.525255
TMED3	AT	RBFOX2	0	-0.505256
SNX29	ES	HNRNPF	0	-0.506362
ACSM2B	ES	PCBP1	0	-0.518488
DCTN5	ES	HNRNPF	0	-0.52134
ZNF747	AT	QKI	0	0.521753
ZNF747	AT	QKI	0	-0.521771
BCL7C	AT	QKI	0	-0.535386
BCL7C	AT	FMR1	0	-0.577541
BCL7C	AT	RBFOX2	0	-0.548402
BCL7C	AT	QKI	0	0.535417
BCL7C	AT	FMR1	0	0.577568
BCL7C	AT	RBFOX2	0	0.548387
SIAH1	AP	HNRNPF	0	-0.507019
CMTM4	AT	QKI	0	0.597435
CMTM4	AT	SYNCRIP	0	0.509855
CMTM4	AT	RBFOX2	0	0.6015
CMTM4	AT	QKI	0	-0.597435
CMTM4	AT	SYNCRIP	0	-0.509855
CMTM4	AT	RBFOX2	0	-0.6015
HAS3	AT	RBFOX2	0	0.500993
HAS3	AT	RBFOX2	0	-0.506215
DDX19A	ES	QKI	0	-0.526103
DDX19A	ES	HNRNPF	0	-0.541032
DDX19A	ES	HNRNPH2	0	-0.53133
IST1	AP	HNRNPF	0	0.513692
IST1	AP	KHDRBS1	0	0.504043
IST1	AP	QKI	0	-0.529456
IST1	AP	HNRNPF	0	-0.535581
IST1	AP	KHDRBS1	0	-0.505264
C16orf46	AT	RBFOX2	0	0.519676
C16orf46	AT	SF1	0	0.506301
C16orf46	AT	RBFOX2	0	-0.519216
C16orf46	AT	SF1	0	-0.505834
CDK10	AP	PCBP1	0	0.522819
CDK10	AP	PCBP1	0	-0.522811
DEF8	AT	SF1	0	-0.507991
DEF8	AT	SF1	0	0.507991
MYO1C	AP	NOVA2	0	0.514792
GPS2	AT	QKI	0	0.60692
GPS2	AT	SYNCRIP	0	0.573708
GPS2	AT	FMR1	0	0.511791
GPS2	AT	HNRNPU	0	0.517745
GPS2	AT	HNRNPF	0	0.556018
GPS2	AT	RBFOX2	0	0.540147
GPS2	AT	HNRNPH2	0	0.520073
GPS2	AT	HNRNPLL	0	0.543982
GPS2	AT	QKI	0	-0.60692
GPS2	AT	SYNCRIP	0	-0.573704
GPS2	AT	FMR1	0	-0.511779
GPS2	AT	HNRNPU	0	-0.517744
GPS2	AT	HNRNPF	0	-0.556026
GPS2	AT	RBFOX2	0	-0.54014
GPS2	AT	HNRNPH2	0	-0.52008
GPS2	AT	HNRNPLL	0	-0.543991
TNFSF12	AT	NOVA2	0	-0.561456
TNFSF12	AT	NOVA2	0	0.561466
LSMD1	AP	TIAL1	0	0.51823
LSMD1	AP	QKI	0	0.520617
LSMD1	AP	RBFOX2	0	0.601927
LSMD1	AP	SF1	0	0.605955
LSMD1	AP	HNRNPH3	0	0.523279
LSMD1	AP	RBMX	0	0.50145
ATPAF2	AT	RBFOX2	0	0.501073
TVP23B	AP	HNRNPF	0	0.500727
TVP23B	AP	HNRNPH2	0	0.519403
TVP23B	AP	QKI	0	-0.511784
TVP23B	AP	HNRNPF	0	-0.518854
TVP23B	AP	HNRNPH2	0	-0.53467
SLC5A10	AP	PCBP1	0	0.511867
SLC5A10	AP	PCBP1	0	-0.524976
MED1	AT	QKI	0	0.636091
MED1	AT	SYNCRIP	0	0.551194
MED1	AT	FMR1	0	0.538123
MED1	AT	HNRNPU	0	0.516017
MED1	AT	HNRNPF	0	0.529283
MED1	AT	RBFOX2	0	0.613238
MED1	AT	HNRNPLL	0	0.51863
MED1	AT	QKI	0	-0.636091
MED1	AT	SYNCRIP	0	-0.551193
MED1	AT	FMR1	0	-0.538121
MED1	AT	HNRNPU	0	-0.516013
MED1	AT	HNRNPF	0	-0.529281
MED1	AT	RBFOX2	0	-0.613238
MED1	AT	HNRNPLL	0	-0.518629
MED1	ES	QKI	0	-0.52555
MED24	AP	HNRNPF	0	-0.509537
MED24	AP	HNRNPH2	0	-0.516079
MED24	AP	HNRNPF	0	0.513784
MED24	AP	HNRNPH2	0	0.515483
MSL1	AT	QKI	0	-0.562674
MSL1	AT	KHDRBS1	0	-0.523046
MSL1	AT	QKI	0	0.562671
MSL1	AT	KHDRBS1	0	0.523031
DHX8	AT	QKI	0	-0.510905
DHX8	AT	QKI	0	0.510896
GOSR2	AT	QKI	0	0.50221
ITGB3	AT	QKI	0	-0.523576
SNX11	ES	HNRNPF	0	-0.510711
ZNF652	AT	QKI	0	0.565276
ZNF652	AT	FMR1	0	0.523468
ZNF652	AT	RBFOX2	0	0.534452
ZNF652	AT	QKI	0	-0.565289
ZNF652	AT	FMR1	0	-0.523486
ZNF652	AT	RBFOX2	0	-0.534458
SPOP	AP	HNRNPF	0	0.548283
SPOP	AP	KHDRBS1	0	0.504089
SPOP	AP	PCBP1	0	0.533682
SPOP	AP	HNRNPF	0	-0.548296
SPOP	AP	KHDRBS1	0	-0.504093
SPOP	AP	PCBP1	0	-0.533688
ABCC3	RI	QKI	0	-0.613405
ABCC3	RI	SYNCRIP	0	-0.537639
ABCC3	RI	RBFOX2	0	-0.526625
PRR11	AT	QKI	0	-0.506218
PRR11	AT	QKI	0	0.506227
PRKAR1A	AT	QKI	0	-0.589974
PRKAR1A	AT	SYNCRIP	0	-0.516284
PRKAR1A	AT	QKI	0	0.59003
PRKAR1A	AT	SYNCRIP	0	0.516316
KCNJ2	AP	QKI	0	-0.552005
KCNJ2	AP	QKI	0	0.555481
ITGB4	ES	NOVA2	0	0.520512
CYGB	AP	NOVA2	0	-0.531748
CYGB	AP	NOVA2	0	0.510596
SEC14L1	AP	QKI	0	0.586181
SEC14L1	AP	SYNCRIP	0	0.529056
SEC14L1	AP	KHDRBS1	0	0.51169
SEC14L1	AP	QKI	0	-0.508821
SS18	ES	QKI	0	-0.504397
ZNF397	AT	HNRNPH2	0	-0.539711
IER3IP1	AT	QKI	0	-0.536196
IER3IP1	AT	HNRNPM	0	-0.500569
IER3IP1	AT	RBFOX2	0	-0.605447
IER3IP1	AT	SF1	0	-0.548572
IER3IP1	AT	PCBP1	0	-0.52862
IER3IP1	AT	QKI	0	0.536184
IER3IP1	AT	HNRNPM	0	0.500564
IER3IP1	AT	RBFOX2	0	0.60545
IER3IP1	AT	SF1	0	0.548561
IER3IP1	AT	PCBP1	0	0.528607
TCF4	AP	QKI	0	0.517159
TCF4	AP	QKI	0	-0.571444
RANBP3	ES	HNRNPH2	0	-0.508483
CD70	AT	QKI	0	0.525195
CD70	AT	SYNCRIP	0	0.522311
CD70	AT	RBFOX2	0	0.511596
ZNF69	AT	QKI	0	0.538003
ZNF69	AT	FMR1	0	0.539116
ZNF69	AT	RBFOX2	0	0.53249
ZNF69	AT	QKI	0	-0.538003
ZNF69	AT	FMR1	0	-0.539116
ZNF69	AT	RBFOX2	0	-0.53249
ZNF44	AT	QKI	0	0.634133
ZNF44	AT	SYNCRIP	0	0.540595
ZNF44	AT	RBFOX2	0	0.550353
EPS15L1	AP	HNRNPF	0	0.519772
EPS15L1	AP	HNRNPH2	0	0.52697
EPS15L1	AP	HNRNPF	0	-0.519772
EPS15L1	AP	HNRNPH2	0	-0.52697
ZNF90	AT	QKI	0	-0.500341
ZNF90	AT	QKI	0	0.501051
ZNF91	AT	QKI	0	0.505908
ZNF91	AT	QKI	0	-0.505914
ZNF302	AA	QKI	0	-0.503605
ZNF260	ES	QKI	0	-0.527423
ZNF260	ES	SYNCRIP	0	-0.504552
ZNF585A	AT	QKI	0	0.565784
ZNF585A	AT	RBFOX2	0	0.598227
ZNF585A	AT	KHDRBS1	0	0.501176
ZNF585B	AP	QKI	0	-0.523009
ZNF585B	AP	SYNCRIP	0	-0.506507
ZNF585B	AP	HNRNPH2	0	-0.516093
ZNF585B	AP	QKI	0	0.523009
ZNF585B	AP	SYNCRIP	0	0.506507
ZNF585B	AP	HNRNPH2	0	0.516093
SAMD4B	AT	QKI	0	-0.629824
SAMD4B	AT	SYNCRIP	0	-0.579257
SAMD4B	AT	FMR1	0	-0.590385
SAMD4B	AT	HNRNPU	0	-0.569573
SAMD4B	AT	HNRNPF	0	-0.531314
SAMD4B	AT	RBFOX2	0	-0.629811
SAMD4B	AT	SF1	0	-0.515438
SAMD4B	AT	HNRNPH3	0	-0.507167
SAMD4B	AT	HNRNPH2	0	-0.536616
SAMD4B	AT	TRA2B	0	-0.525614
SAMD4B	AT	RBM4	0	-0.538566
SAMD4B	AT	RBMX	0	-0.514754
SAMD4B	AT	KHDRBS1	0	-0.541549
SAMD4B	AT	HNRNPLL	0	-0.527107
SAMD4B	AT	QKI	0	0.629824
SAMD4B	AT	SYNCRIP	0	0.579257
SAMD4B	AT	FMR1	0	0.590385
SAMD4B	AT	HNRNPU	0	0.569573
SAMD4B	AT	HNRNPF	0	0.531314
SAMD4B	AT	RBFOX2	0	0.629811
SAMD4B	AT	SF1	0	0.515438
SAMD4B	AT	HNRNPH3	0	0.507167
SAMD4B	AT	HNRNPH2	0	0.536616
SAMD4B	AT	TRA2B	0	0.525614
SAMD4B	AT	RBM4	0	0.538566
SAMD4B	AT	RBMX	0	0.514754
SAMD4B	AT	KHDRBS1	0	0.541549
SAMD4B	AT	HNRNPLL	0	0.527107
SYMPK	AP	HNRNPA0	0	0.516546
SYMPK	AP	PCBP1	0	0.522734
SYMPK	AP	HNRNPA0	0	-0.516546
SYMPK	AP	PCBP1	0	-0.522734
NUP62	RI	QKI	0	-0.511851
NUP62	RI	KHDRBS1	0	-0.524024
ZNF614	AT	QKI	0	0.530113
ZNF614	AT	SYNCRIP	0	0.501054
ZNF614	AT	KHDRBS1	0	0.500198
ZNF614	AT	QKI	0	-0.530109
ZNF614	AT	SYNCRIP	0	-0.501045
ZNF614	AT	KHDRBS1	0	-0.500193
ZNF836	AT	QKI	0	0.514845
ZNF836	AT	KHDRBS1	0	0.524572
ZNF836	AT	QKI	0	-0.514845
ZNF836	AT	KHDRBS1	0	-0.524572
ZNF528	AT	QKI	0	-0.500124
ZNF808	AT	QKI	0	0.529372
ZNF808	AT	QKI	0	-0.529371
ZNF677	AT	QKI	0	0.576264
ZNF677	AT	RBFOX2	0	0.50488
ZNF677	AT	QKI	0	-0.57097
ZNF677	AT	RBFOX2	0	-0.507849
ZNF677	AT	QKI	0	0.525013
RPL28	AA	KHDRBS1	0	-0.51278
RPL28	AA	PCBP1	0	-0.509367
ZNF264	AT	QKI	0	-0.562882
ZNF264	AT	SYNCRIP	0	-0.520537
ZNF264	AT	RBFOX2	0	-0.551262
ZNF264	AT	QKI	0	0.589888
ZNF264	AT	SYNCRIP	0	0.539248
ZNF264	AT	HNRNPU	0	0.50779
ZNF264	AT	RBFOX2	0	0.545091
ZNF264	AT	KHDRBS1	0	0.524025
ZNF587B	AT	QKI	0	0.5293
ZNF587B	AT	RBFOX2	0	0.543272
ZNF587B	AT	QKI	0	-0.590832
ZNF587B	AT	RBFOX2	0	-0.576811
ZNF329	ES	QKI	0	-0.524798
ZNF544	ES	HNRNPH2	0	-0.525502
KIDINS220	ES	QKI	0	-0.528452
EFR3B	AT	RBFOX2	0	-0.506953
EFR3B	AT	HNRNPH2	0	-0.50987
EFR3B	AT	RBFOX2	0	0.509717
EFR3B	AT	HNRNPH2	0	0.509207
AGBL5	AT	RBFOX2	0	-0.569196
AGBL5	AT	SF1	0	-0.568389
AGBL5	AT	HNRNPH3	0	-0.571408
AGBL5	AT	TRA2B	0	-0.502802
AGBL5	AT	RBMX	0	-0.626391
AGBL5	AT	KHDRBS1	0	-0.535516
AGBL5	AT	PCBP1	0	-0.526969
AGBL5	AT	HNRNPDL	0	-0.536336
AGBL5	AT	RBFOX2	0	0.569192
AGBL5	AT	SF1	0	0.568414
AGBL5	AT	HNRNPH3	0	0.571424
AGBL5	AT	TRA2B	0	0.502826
AGBL5	AT	RBMX	0	0.62641
AGBL5	AT	KHDRBS1	0	0.535537
AGBL5	AT	PCBP1	0	0.526988
AGBL5	AT	HNRNPDL	0	0.536342
ZNF512	AT	QKI	0	-0.512541
ZNF512	AT	HNRNPF	0	-0.556141
ZNF512	AT	QKI	0	0.512545
ZNF512	AT	HNRNPF	0	0.556155
MRPL33	AT	QKI	0	0.527764
MRPL33	AT	RBFOX2	0	0.501217
MRPL33	AT	PCBP1	0	0.550476
MRPL33	AT	QKI	0	-0.527764
MRPL33	AT	RBFOX2	0	-0.501217
MRPL33	AT	PCBP1	0	-0.550476
LBH	ES	QKI	0	-0.550217
RASGRP3	AP	NOVA2	0	0.706666
ATL2	ES	HNRNPF	0	-0.501838
ATL2	ES	HNRNPH2	0	-0.503215
SLC3A1	AP	PCBP1	0	-0.592976
SLC3A1	AP	PCBP1	0	0.556299
MCFD2	ES	HNRNPF	0	-0.518816
MCFD2	ES	PCBP1	0	-0.50517
SPTBN1	AP	NOVA2	0	0.522824
SPTBN1	AP	NOVA2	0	-0.501681
CCT4	ES	QKI	0	-0.577623
CCT4	ES	RBFOX2	0	-0.596703
CCT4	ES	KHDRBS1	0	-0.539936
PCYOX1	AP	QKI	0	0.508242
PCYOX1	AP	HNRNPU	0	0.520454
PCYOX1	AP	HNRNPM	0	0.539254
PCYOX1	AP	HNRNPF	0	0.554414
PCYOX1	AP	RBFOX2	0	0.501601
PCYOX1	AP	HNRNPH2	0	0.522337
PCYOX1	AP	PCBP1	0	0.55594
PCYOX1	AP	QKI	0	-0.508419
PCYOX1	AP	HNRNPU	0	-0.520549
PCYOX1	AP	HNRNPM	0	-0.53946
PCYOX1	AP	HNRNPF	0	-0.554254
PCYOX1	AP	RBFOX2	0	-0.501708
PCYOX1	AP	HNRNPH2	0	-0.522576
PCYOX1	AP	PCBP1	0	-0.555401
ZNF638	AP	HNRNPF	0	-0.5084
WDR33	RI	QKI	0	-0.560053
WDR33	RI	SYNCRIP	0	-0.523433
WDR33	RI	HNRNPF	0	-0.501814
WDR33	RI	RBFOX2	0	-0.573348
PLEKHB2	AP	HNRNPF	0	-0.550941
PLEKHB2	AP	HNRNPH2	0	-0.52768
PLEKHB2	AP	HNRNPF	0	0.550244
PLEKHB2	AP	HNRNPH2	0	0.526262
PLEKHB2	AT	NOVA2	0	0.537582
PLEKHB2	AT	NOVA2	0	-0.5376
RAB3GAP1	ES	QKI	0	-0.554611
RAB3GAP1	ES	SYNCRIP	0	-0.511232
RAB3GAP1	ES	HNRNPF	0	-0.517937
RAB3GAP1	ES	HNRNPH2	0	-0.522838
PDK1	AP	QKI	0	-0.504009
PDK1	AP	QKI	0	0.504171
MLTK	AT	RBFOX2	0	0.551017
MLTK	AT	RBFOX2	0	-0.551017
STAT1	AT	RBFOX2	0	0.552477
STAT1	AT	HNRNPH2	0	0.506251
STAT1	AT	RBFOX2	0	-0.552462
STAT1	AT	HNRNPH2	0	-0.50625
CFLAR	AP	RBFOX2	0	0.51713
CFLAR	ES	QKI	0	-0.54595
PLEKHM3	AT	QKI	0	0.538396
PLEKHM3	AT	RBFOX2	0	0.501256
PLEKHM3	AT	QKI	0	-0.539379
PLEKHM3	AT	RBFOX2	0	-0.505454
SPAG16	AT	QKI	0	0.536165
SPAG16	AT	RBFOX2	0	0.510799
RQCD1	ES	QKI	0	-0.526836
RQCD1	ES	HNRNPF	0	-0.513154
RQCD1	ES	HNRNPH2	0	-0.516574
AP1S3	AT	RBFOX2	0	-0.521081
AP1S3	AT	SF1	0	-0.537947
AP1S3	AT	RBFOX2	0	0.511885
AP1S3	AT	SF1	0	0.510257
SP110	AT	QKI	0	0.57337
SP110	AT	SYNCRIP	0	0.50362
SP110	AT	FMR1	0	0.508049
SP110	AT	RBFOX2	0	0.643903
SP110	AT	SF1	0	0.576666
SP110	AT	TRA2B	0	0.508484
SP110	AT	RBMX	0	0.507637
SP110	AT	QKI	0	-0.57337
SP110	AT	SYNCRIP	0	-0.50362
SP110	AT	FMR1	0	-0.508049
SP110	AT	RBFOX2	0	-0.643903
SP110	AT	SF1	0	-0.576666
SP110	AT	TRA2B	0	-0.508484
SP110	AT	RBMX	0	-0.507637
SP140	AT	FMR1	0	0.501234
SP100	AT	QKI	0	0.614508
SP100	AT	SYNCRIP	0	0.533743
SP100	AT	HNRNPU	0	0.500145
SP100	AT	RBFOX2	0	0.607876
SP100	AT	QKI	0	-0.581088
SP100	AT	RBFOX2	0	-0.592315
EIF4E2	AT	QKI	0	0.617936
EIF4E2	AT	SYNCRIP	0	0.591515
EIF4E2	AT	FMR1	0	0.521206
EIF4E2	AT	HNRNPU	0	0.566351
EIF4E2	AT	RBFOX2	0	0.539925
EIF4E2	AT	HNRNPH2	0	0.526883
EIF4E2	AT	KHDRBS1	0	0.527306
EIF4E2	AT	PCBP1	0	0.521725
EIF4E2	AT	HNRNPLL	0	0.511224
EIF4E2	AT	QKI	0	-0.619626
EIF4E2	AT	SYNCRIP	0	-0.588289
EIF4E2	AT	FMR1	0	-0.551639
EIF4E2	AT	HNRNPU	0	-0.550848
EIF4E2	AT	RBFOX2	0	-0.561433
EIF4E2	AT	SF1	0	-0.509134
EIF4E2	AT	KHDRBS1	0	-0.50277
EIF4E2	AT	HNRNPLL	0	-0.51848
FAM110A	ES	RBFOX2	0	-0.505872
PTPRA	AP	QKI	0	0.536192
PTPRA	AP	QKI	0	-0.526651
ITCH	ES	QKI	0	-0.539329
PHF20	ES	QKI	0	-0.520235
EPB41L1	ES	NOVA2	0	0.515881
CHD6	RI	QKI	0	-0.531782
CHD6	RI	RBFOX2	0	-0.503459
ATP5J	AT	NOVA2	0	0.655475
ATP5J	AT	NOVA2	0	-0.655475
GABPA	AP	QKI	0	-0.619141
GABPA	AP	RBFOX2	0	-0.560004
GABPA	AP	KHDRBS1	0	-0.532338
GABPA	AP	QKI	0	0.613576
GABPA	AP	RBFOX2	0	0.557748
GABPA	AP	KHDRBS1	0	0.528309
IFNAR2	AA	QKI	0	-0.579494
IFNAR2	AA	FMR1	0	-0.51233
IFNAR2	AA	RBFOX2	0	-0.548743
IFNAR1	AP	QKI	0	-0.671303
IFNAR1	AP	SYNCRIP	0	-0.608618
IFNAR1	AP	HNRNPU	0	-0.543045
IFNAR1	AP	HNRNPM	0	-0.501123
IFNAR1	AP	HNRNPF	0	-0.505194
IFNAR1	AP	RBFOX2	0	-0.616073
IFNAR1	AP	KHDRBS1	0	-0.521171
IFNAR1	AP	MBNL1	0	-0.500908
IFNAR1	AP	QKI	0	0.671052
IFNAR1	AP	SYNCRIP	0	0.608288
IFNAR1	AP	HNRNPU	0	0.542783
IFNAR1	AP	HNRNPM	0	0.501194
IFNAR1	AP	HNRNPF	0	0.504908
IFNAR1	AP	RBFOX2	0	0.615689
IFNAR1	AP	KHDRBS1	0	0.520966
IFNAR1	AP	MBNL1	0	0.500377
RCAN1	AP	PCBP1	0	0.500895
TTC3	AP	QKI	0	-0.526371
TTC3	AP	QKI	0	0.519389
C22orf39	AT	QKI	0	0.502966
C22orf39	AT	QKI	0	-0.542619
C22orf39	AT	RBFOX2	0	-0.56159
C22orf39	AT	RBFOX2	0	0.520172
MAPK1	AT	KHDRBS1	0	0.531225
MAPK1	AT	PCBP1	0	0.57002
MAPK1	AT	KHDRBS1	0	-0.531226
MAPK1	AT	PCBP1	0	-0.570009
KIAA1671	AP	PCBP1	0	0.511942
DUSP18	AT	QKI	0	-0.504225
DUSP18	AT	QKI	0	0.533953
DUSP18	AT	SYNCRIP	0	0.522845
TBC1D22A	AP	PCBP1	0	0.522226
TBC1D22A	AP	HNRNPF	0	-0.504595
TBC1D5	AP	QKI	0	0.521353
TBC1D5	AP	HNRNPH2	0	0.510179
TBC1D5	AP	KHDRBS1	0	0.503111
TBC1D5	AP	QKI	0	-0.530066
TBC1D5	AP	SYNCRIP	0	-0.505374
TBC1D5	AP	HNRNPH2	0	-0.518117
TBC1D5	AP	KHDRBS1	0	-0.506228
AZI2	AT	QKI	0	-0.559178
AZI2	AT	RBFOX2	0	-0.565301
AZI2	AT	QKI	0	0.559184
AZI2	AT	RBFOX2	0	0.565313
SEC22C	AT	QKI	0	0.59374
SEC22C	AT	SYNCRIP	0	0.541021
SEC22C	AT	HNRNPU	0	0.522462
SEC22C	AT	HNRNPM	0	0.539627
SEC22C	AT	HNRNPF	0	0.51605
SEC22C	AT	RBFOX2	0	0.599479
SEC22C	AT	SF1	0	0.553162
SEC22C	AT	HNRNPLL	0	0.53147
SEC22C	AT	QKI	0	-0.593753
SEC22C	AT	SYNCRIP	0	-0.541025
SEC22C	AT	HNRNPU	0	-0.522455
SEC22C	AT	HNRNPM	0	-0.539618
SEC22C	AT	HNRNPF	0	-0.516048
SEC22C	AT	RBFOX2	0	-0.599489
SEC22C	AT	SF1	0	-0.553162
SEC22C	AT	HNRNPLL	0	-0.531456
TCAIM	ES	QKI	0	-0.524359
CCR2	AT	QKI	0	-0.581307
CCR2	AT	FMR1	0	-0.524446
CCR2	AT	HNRNPF	0	-0.51966
CCR2	AT	RBFOX2	0	-0.510442
CCR2	AT	HNRNPLL	0	-0.524164
CCR2	AT	QKI	0	0.581419
CCR2	AT	FMR1	0	0.524404
CCR2	AT	HNRNPF	0	0.519739
CCR2	AT	RBFOX2	0	0.51057
CCR2	AT	HNRNPLL	0	0.524183
DHX30	ES	QKI	0	-0.570575
DHX30	ES	RBFOX2	0	-0.610237
RBM6	AT	QKI	0	0.622953
RBM6	AT	SYNCRIP	0	0.566458
RBM6	AT	FMR1	0	0.508596
RBM6	AT	HNRNPU	0	0.543154
RBM6	AT	HNRNPF	0	0.519496
RBM6	AT	RBFOX2	0	0.560155
RBM6	AT	KHDRBS1	0	0.537495
RBM6	AT	QKI	0	-0.622953
RBM6	AT	SYNCRIP	0	-0.566458
RBM6	AT	FMR1	0	-0.508596
RBM6	AT	HNRNPU	0	-0.543154
RBM6	AT	HNRNPF	0	-0.519496
RBM6	AT	RBFOX2	0	-0.560155
RBM6	AT	KHDRBS1	0	-0.537495
GNAI2	AP	HNRNPM	0	-0.500755
GNAI2	AP	HNRNPA0	0	-0.508451
GNAI2	AP	HNRNPM	0	0.502995
GNAI2	AP	HNRNPA0	0	0.515515
SMIM4	AT	QKI	0	-0.629409
SMIM4	AT	SYNCRIP	0	-0.576318
SMIM4	AT	HNRNPU	0	-0.537036
SMIM4	AT	HNRNPM	0	-0.527574
SMIM4	AT	HNRNPF	0	-0.519781
SMIM4	AT	RBFOX2	0	-0.618123
SMIM4	AT	KHDRBS1	0	-0.571286
SMIM4	AT	PCBP1	0	-0.527038
SMIM4	AT	QKI	0	0.629409
SMIM4	AT	SYNCRIP	0	0.576318
SMIM4	AT	HNRNPU	0	0.537036
SMIM4	AT	HNRNPM	0	0.527574
SMIM4	AT	HNRNPF	0	0.519781
SMIM4	AT	RBFOX2	0	0.618123
SMIM4	AT	KHDRBS1	0	0.571286
SMIM4	AT	PCBP1	0	0.527038
ARHGEF3	AP	NOVA2	0	0.571906
ZNF717	AT	RBFOX2	0	0.521448
ZNF717	AT	RBFOX2	0	-0.521448
ARL6	AT	QKI	0	-0.599658
ARL6	AT	SYNCRIP	0	-0.504773
ARL6	AT	HNRNPLL	0	-0.520722
ARL6	AT	QKI	0	0.599653
ARL6	AT	SYNCRIP	0	0.504763
ARL6	AT	HNRNPLL	0	0.520717
SLC35A5	AP	QKI	0	0.504779
SLC35A5	AP	QKI	0	-0.504771
COX17	AT	RBFOX2	0	-0.599191
COX17	AT	NOVA2	0	-0.662195
COX17	AT	RBFOX2	0	0.576274
COX17	AT	NOVA2	0	0.703691
MYLK	AP	PCBP1	0	-0.53068
RUVBL1	AT	QKI	0	-0.570877
RUVBL1	AT	RBFOX2	0	-0.60153
RUVBL1	AT	SF1	0	-0.525589
RUVBL1	AT	QKI	0	0.570877
RUVBL1	AT	RBFOX2	0	0.601536
RUVBL1	AT	SF1	0	0.525585
STAG1	ES	QKI	0	-0.501358
MBNL1	ES	QKI	0	-0.555592
MBNL1	ES	HNRNPF	0	-0.52739
MBNL1	ES	MBNL1	0	-0.543201
MCCC1	AP	PCBP1	0	0.518737
MCCC1	AP	PCBP1	0	-0.505728
VPS8	ES	QKI	0	-0.507049
CRYGS	AP	QKI	0	-0.562196
CRYGS	AP	RBFOX2	0	-0.511381
CRYGS	AP	QKI	0	0.562114
CRYGS	AP	RBFOX2	0	0.511547
ZNF141	AT	QKI	0	-0.597749
ZNF141	AT	SYNCRIP	0	-0.526775
ZNF141	AT	KHDRBS1	0	-0.540693
ZNF141	AT	QKI	0	0.597746
ZNF141	AT	SYNCRIP	0	0.526779
ZNF141	AT	KHDRBS1	0	0.540692
RNF4	AP	HNRNPF	0	0.50029
RNF4	AP	HNRNPF	0	-0.501607
SEPSECS	ES	HNRNPF	0	-0.506509
RUFY3	AT	QKI	0	0.568831
RUFY3	AT	SYNCRIP	0	0.524514
RUFY3	AT	FMR1	0	0.512756
RUFY3	AT	HNRNPU	0	0.50263
RUFY3	AT	RBFOX2	0	0.553866
RUFY3	AT	HNRNPLL	0	0.514542
SLC4A4	AT	QKI	0	-0.515512
SLC4A4	AT	QKI	0	0.515512
CCNG2	AT	RBFOX2	0	-0.516254
CCNG2	AT	SF1	0	-0.558713
CCNG2	AT	RBFOX2	0	0.516164
CCNG2	AT	SF1	0	0.558584
BMP2K	AT	QKI	0	-0.601359
BMP2K	AT	SYNCRIP	0	-0.511946
BMP2K	AT	HNRNPF	0	-0.508223
BMP2K	AT	RBFOX2	0	-0.609144
BMP2K	AT	QKI	0	0.601359
BMP2K	AT	SYNCRIP	0	0.511946
BMP2K	AT	HNRNPF	0	0.508223
BMP2K	AT	RBFOX2	0	0.609144
SEC31A	AD	QKI	0	-0.547915
SEC31A	AD	HNRNPF	0	-0.513387
FAM175A	AT	KHDRBS1	0	-0.511703
FAM175A	AT	KHDRBS1	0	0.511703
PDLIM5	AA	NOVA2	0	-0.564291
PPA2	AT	QKI	0	0.536403
PPA2	AT	RBFOX2	0	0.553085
PPA2	AT	SF1	0	0.502089
PPA2	AT	TRA2B	0	0.509221
PPA2	AT	RBMX	0	0.52066
PPA2	AT	KHDRBS1	0	0.535412
PPA2	AT	QKI	0	-0.536403
PPA2	AT	RBFOX2	0	-0.553085
PPA2	AT	SF1	0	-0.502089
PPA2	AT	TRA2B	0	-0.509221
PPA2	AT	RBMX	0	-0.52066
PPA2	AT	KHDRBS1	0	-0.535412
TBCK	AP	QKI	0	-0.614213
TBCK	AP	SYNCRIP	0	-0.55352
TBCK	AP	HNRNPU	0	-0.503064
TBCK	AP	RBFOX2	0	-0.545224
TBCK	AP	HNRNPH2	0	-0.522877
TBCK	AP	KHDRBS1	0	-0.512098
TBCK	AP	HNRNPLL	0	-0.539244
TBCK	AP	QKI	0	0.614153
TBCK	AP	SYNCRIP	0	0.553433
TBCK	AP	HNRNPU	0	0.502946
TBCK	AP	RBFOX2	0	0.545135
TBCK	AP	HNRNPH2	0	0.522762
TBCK	AP	KHDRBS1	0	0.512015
TBCK	AP	HNRNPLL	0	0.53916
CFI	AT	TIAL1	0	0.51591
CFI	AT	TIAL1	0	-0.51591
SYNPO2	AT	QKI	0	-0.517744
SYNPO2	AT	FMR1	0	-0.501464
SYNPO2	AT	RBFOX2	0	-0.527238
SYNPO2	AT	QKI	0	0.568185
SYNPO2	AT	SYNCRIP	0	0.501609
SYNPO2	AT	RBFOX2	0	0.578958
MFAP3L	AP	PCBP1	0	0.502164
MFAP3L	AP	PCBP1	0	-0.504758
IPO11	ES	NOVA2	0	0.674486
MAST4	AP	QKI	0	0.519154
MAST4	AP	SYNCRIP	0	0.507993
MAST4	AP	RBFOX2	0	0.520034
MAST4	AT	QKI	0	0.607788
MAST4	AT	SYNCRIP	0	0.547889
MAST4	AT	RBFOX2	0	0.568319
MAST4	AT	KHDRBS1	0	0.573937
SLC30A5	AA	QKI	0	-0.602009
PTCD2	AT	RBFOX2	0	-0.500041
PTCD2	AT	RBFOX2	0	0.500037
HEXB	AP	RBFOX2	0	0.502039
ARSB	AT	RBFOX2	0	-0.501109
ARSB	AT	RBFOX2	0	0.501095
SERINC5	AT	QKI	0	-0.537399
SERINC5	AT	HNRNPF	0	-0.512144
SERINC5	AT	RBFOX2	0	-0.530682
SERINC5	AT	HNRNPH2	0	-0.53826
SERINC5	AT	QKI	0	0.537451
SERINC5	AT	HNRNPF	0	0.512239
SERINC5	AT	RBFOX2	0	0.530751
SERINC5	AT	HNRNPH2	0	0.538358
MEF2C	AP	QKI	0	-0.57206
MEF2C	AP	KHDRBS1	0	-0.51899
MEF2C	AP	QKI	0	0.571133
MEF2C	AP	KHDRBS1	0	0.517998
FER	AP	QKI	0	0.6073
FER	AP	SYNCRIP	0	0.554314
FER	AP	HNRNPU	0	0.534608
FER	AP	HNRNPF	0	0.508284
FER	AP	RBFOX2	0	0.555704
FER	AP	HNRNPH2	0	0.51346
FER	AP	KHDRBS1	0	0.535197
FER	AP	QKI	0	-0.503784
ZCCHC10	AT	QKI	0	-0.606405
ZCCHC10	AT	SYNCRIP	0	-0.515477
ZCCHC10	AT	RBFOX2	0	-0.566808
ZCCHC10	AT	HNRNPH3	0	-0.500895
ZCCHC10	AT	RBMX	0	-0.530037
ZCCHC10	AT	KHDRBS1	0	-0.522747
ZCCHC10	AT	QKI	0	0.606392
ZCCHC10	AT	SYNCRIP	0	0.515456
ZCCHC10	AT	RBFOX2	0	0.566802
ZCCHC10	AT	HNRNPH3	0	0.500877
ZCCHC10	AT	RBMX	0	0.530036
ZCCHC10	AT	KHDRBS1	0	0.522729
CDKL3	AP	QKI	0	0.501766
CDKL3	AP	KHDRBS1	0	0.517941
CDKL3	AT	QKI	0	0.525873
PCDH1	AT	QKI	0	0.535798
PCDH1	AT	RBFOX2	0	0.583863
PCDH1	AT	QKI	0	-0.535805
PCDH1	AT	RBFOX2	0	-0.583839
CYFIP2	AP	PCBP1	0	0.5031
FLT4	AT	NOVA2	0	-0.642083
FLT4	AT	NOVA2	0	0.642083
PSMG4	AT	QKI	0	0.536737
PSMG4	AT	RBFOX2	0	0.513031
POLH	AT	QKI	0	0.552878
POLH	AT	SYNCRIP	0	0.503026
POLH	AT	FMR1	0	0.501835
POLH	AT	QKI	0	-0.552878
POLH	AT	SYNCRIP	0	-0.503026
POLH	AT	FMR1	0	-0.501835
PTCHD4	AT	PCBP1	0	0.554597
PTCHD4	AT	PCBP1	0	-0.554756
FYN	ME	NOVA2	0	0.509192
FYN	ME	ELAVL2	0	0.500089
EPB41L2	ES	NOVA2	0	0.54492
UTRN	ES	NOVA2	0	0.508097
SYNJ2	AD	QKI	0	-0.608214
SYNJ2	AD	SYNCRIP	0	-0.513246
SYNJ2	AD	RBFOX2	0	-0.525548
SYNJ2	AD	KHDRBS1	0	-0.534058
MAP3K4	ES	QKI	0	-0.565527
MAP3K4	ES	SYNCRIP	0	-0.515374
MAP3K4	ES	KHDRBS1	0	-0.501848
ZFAND2A	AT	QKI	0	0.56012
ZFAND2A	AT	SYNCRIP	0	0.532179
ZFAND2A	AT	HNRNPU	0	0.51412
ZFAND2A	AT	HNRNPM	0	0.505803
ZFAND2A	AT	RBFOX2	0	0.567312
ZFAND2A	AT	QKI	0	-0.56012
ZFAND2A	AT	SYNCRIP	0	-0.532179
ZFAND2A	AT	HNRNPU	0	-0.51412
ZFAND2A	AT	HNRNPM	0	-0.505803
ZFAND2A	AT	RBFOX2	0	-0.567312
USP42	ES	QKI	0	-0.514502
USP42	ES	HNRNPH2	0	-0.512397
NUPL2	AT	RBFOX2	0	0.507038
NUPL2	AT	SF1	0	0.553061
NUPL2	AT	RBFOX2	0	-0.507045
NUPL2	AT	SF1	0	-0.553073
PLEKHA8	AT	RBFOX2	0	0.543531
YAE1D1	AT	QKI	0	-0.520858
YAE1D1	AT	RBFOX2	0	-0.541346
YAE1D1	AT	QKI	0	0.520818
YAE1D1	AT	RBFOX2	0	0.541334
URGCP	AP	SYNCRIP	0	0.506795
URGCP	AP	HNRNPF	0	0.522573
URGCP	AP	HNRNPH2	0	0.52794
CRCP	ES	HNRNPF	0	-0.519944
KCTD7	ES	QKI	0	-0.603406
KCTD7	ES	SYNCRIP	0	-0.529918
KCTD7	ES	HNRNPF	0	-0.508976
BCL7B	ES	HNRNPF	0	-0.525148
WBSCR22	AT	TIAL1	0	-0.502557
GTF2IRD2	AT	RBFOX2	0	0.523138
GTF2IRD2	AT	SF1	0	0.511283
GTF2IRD2	AT	NOVA2	0	0.515451
DMTF1	ES	QKI	0	-0.549996
DMTF1	ES	SYNCRIP	0	-0.541976
DMTF1	ES	HNRNPU	0	-0.50143
DMTF1	ES	HNRNPF	0	-0.551248
DMTF1	ES	HNRNPLL	0	-0.501874
SHFM1	AT	RBFOX2	0	-0.53294
ARPC1A	AT	QKI	0	-0.547332
ARPC1A	AT	HNRNPF	0	-0.506852
ARPC1A	AT	RBFOX2	0	-0.514261
ARPC1A	AT	QKI	0	0.547332
ARPC1A	AT	HNRNPF	0	0.506852
ARPC1A	AT	RBFOX2	0	0.514261
CUX1	AT	QKI	0	0.592608
CUX1	AT	SYNCRIP	0	0.535935
CUX1	AT	HNRNPU	0	0.510524
CUX1	AT	RBFOX2	0	0.599287
CUX1	AT	KHDRBS1	0	0.527792
CUX1	AT	QKI	0	-0.592606
CUX1	AT	SYNCRIP	0	-0.535933
CUX1	AT	HNRNPU	0	-0.510522
CUX1	AT	RBFOX2	0	-0.599285
CUX1	AT	KHDRBS1	0	-0.527791
PODXL	ES	QKI	0	-0.549244
CHCHD3	AT	QKI	0	-0.520479
CHCHD3	AT	HNRNPA1	0	-0.528617
CHCHD3	AT	RBFOX2	0	-0.569168
CHCHD3	AT	KHDRBS1	0	-0.521947
CHCHD3	AT	QKI	0	0.520454
CHCHD3	AT	HNRNPA1	0	0.530259
CHCHD3	AT	RBFOX2	0	0.568367
CHCHD3	AT	KHDRBS1	0	0.522463
CNOT4	AT	QKI	0	0.580144
CNOT4	AT	KHDRBS1	0	0.552294
CREB3L2	AT	QKI	0	0.544871
CREB3L2	AT	SYNCRIP	0	0.51247
CREB3L2	AT	KHDRBS1	0	0.527487
CREB3L2	AT	RBFOX2	0	-0.571294
C7orf55-LUC7L2	AP	QKI	0	0.51813
NDUFB2	AT	TIAL1	0	0.512478
NDUFB2	AT	QKI	0	0.643321
NDUFB2	AT	SYNCRIP	0	0.551125
NDUFB2	AT	FMR1	0	0.506103
NDUFB2	AT	HNRNPU	0	0.529792
NDUFB2	AT	RBFOX2	0	0.647273
NDUFB2	AT	SF1	0	0.560985
NDUFB2	AT	HNRNPH3	0	0.553153
NDUFB2	AT	RBMX	0	0.542998
NDUFB2	AT	KHDRBS1	0	0.554452
NDUFB2	AT	HNRNPDL	0	0.521118
SLC4A2	AP	NOVA2	0	0.513662
ESYT2	AP	QKI	0	0.504699
ESYT2	AP	QKI	0	-0.50471
CNOT7	AT	QKI	0	0.533759
CNOT7	AT	RBFOX2	0	0.52324
CNOT7	AT	QKI	0	-0.53379
CNOT7	AT	RBFOX2	0	-0.523236
CHMP7	ES	QKI	0	-0.5202
CHMP7	ES	HNRNPF	0	-0.513676
PPAPDC1B	AT	RBFOX2	0	0.523376
HGSNAT	AP	QKI	0	0.543467
HGSNAT	AP	QKI	0	-0.543468
UBE2V2	AP	QKI	0	-0.508514
UBE2V2	AP	SYNCRIP	0	-0.511427
UBE2V2	AP	HNRNPU	0	-0.520234
UBE2V2	AP	HNRNPF	0	-0.557586
UBE2V2	AP	HNRNPH2	0	-0.540616
UBE2V2	AP	PCBP1	0	-0.513591
UBE2V2	AP	QKI	0	0.508514
UBE2V2	AP	SYNCRIP	0	0.511427
UBE2V2	AP	HNRNPU	0	0.520234
UBE2V2	AP	HNRNPF	0	0.557586
UBE2V2	AP	HNRNPH2	0	0.540616
UBE2V2	AP	PCBP1	0	0.513591
ASPH	AT	QKI	0	-0.578427
ASPH	AT	SYNCRIP	0	-0.506405
ASPH	AT	HNRNPU	0	-0.501173
ASPH	AT	RBFOX2	0	-0.581261
ASPH	AT	RBMX	0	-0.536132
ASPH	AT	KHDRBS1	0	-0.548117
ASPH	AT	PCBP1	0	-0.520597
ASPH	AT	QKI	0	0.57708
ASPH	AT	SYNCRIP	0	0.501869
ASPH	AT	RBFOX2	0	0.58499
ASPH	AT	RBMX	0	0.531093
ASPH	AT	KHDRBS1	0	0.56002
ASPH	AT	PCBP1	0	0.528133
TMEM67	ES	QKI	0	-0.551352
TMEM67	ES	SYNCRIP	0	-0.504512
TMEM67	ES	HNRNPH2	0	-0.504997
RAD54B	AT	QKI	0	-0.541443
RAD54B	AT	SYNCRIP	0	-0.527189
RAD54B	AT	HNRNPH2	0	-0.514713
RAD54B	AT	QKI	0	0.5414
RAD54B	AT	SYNCRIP	0	0.52715
RAD54B	AT	HNRNPH2	0	0.514679
ANGPT1	AP	QKI	0	-0.574589
ANGPT1	AP	SYNCRIP	0	-0.503642
ANGPT1	AP	KHDRBS1	0	-0.504923
ANGPT1	AP	QKI	0	0.574589
ANGPT1	AP	SYNCRIP	0	0.503642
ANGPT1	AP	KHDRBS1	0	0.504923
NDUFB9	AT	QKI	0	0.642896
NDUFB9	AT	SYNCRIP	0	0.553855
NDUFB9	AT	FMR1	0	0.541659
NDUFB9	AT	HNRNPU	0	0.535096
NDUFB9	AT	HNRNPM	0	0.500288
NDUFB9	AT	RBFOX2	0	0.634658
NDUFB9	AT	SF1	0	0.55273
NDUFB9	AT	HNRNPH3	0	0.50749
NDUFB9	AT	TRA2B	0	0.527422
NDUFB9	AT	RBMX	0	0.501311
NDUFB9	AT	KHDRBS1	0	0.535838
NDUFB9	AT	HNRNPLL	0	0.535695
NDUFB9	AT	QKI	0	-0.634267
NDUFB9	AT	SYNCRIP	0	-0.542873
NDUFB9	AT	FMR1	0	-0.539701
NDUFB9	AT	HNRNPU	0	-0.52033
NDUFB9	AT	RBFOX2	0	-0.628576
NDUFB9	AT	SF1	0	-0.557832
NDUFB9	AT	HNRNPH3	0	-0.510221
NDUFB9	AT	TRA2B	0	-0.525201
NDUFB9	AT	KHDRBS1	0	-0.519924
NDUFB9	AT	HNRNPLL	0	-0.527529
DOCK8	ES	QKI	0	-0.527651
DOCK8	ES	SYNCRIP	0	-0.504288
SMARCA2	AP	PCBP1	0	0.506063
PSIP1	AT	KHDRBS1	0	0.538655
PSIP1	AT	KHDRBS1	0	-0.538641
PTPLAD2	AT	QKI	0	-0.596261
PTPLAD2	AT	SYNCRIP	0	-0.525494
PTPLAD2	AT	RBFOX2	0	-0.537908
PTPLAD2	AT	QKI	0	0.596261
PTPLAD2	AT	SYNCRIP	0	0.525494
PTPLAD2	AT	RBFOX2	0	0.537908
MTAP	AT	QKI	0	0.531975
MTAP	AT	FMR1	0	0.536154
MTAP	AT	RBFOX2	0	0.570337
MTAP	AT	QKI	0	-0.531975
MTAP	AT	FMR1	0	-0.536154
MTAP	AT	RBFOX2	0	-0.570337
VPS13A	AP	QKI	0	-0.501745
VPS13A	AT	QKI	0	0.53469
VPS13A	AT	RBFOX2	0	0.525094
SPIN1	ES	QKI	0	-0.50128
SPTLC1	AT	QKI	0	-0.515798
SPTLC1	AT	QKI	0	0.515798
SLC35D2	AT	PCBP1	0	0.500893
SLC35D2	AT	PCBP1	0	-0.500893
RGS3	AP	NOVA2	0	0.624002
RGS3	AP	PCBP1	0	0.503487
RGS3	AT	QKI	0	0.544905
RGS3	AT	RBFOX2	0	0.535937
RGS3	AT	QKI	0	-0.544905
RGS3	AT	RBFOX2	0	-0.535937
PHF19	AT	RBFOX2	0	-0.523735
PHF19	AT	RBFOX2	0	0.523735
RC3H2	AT	QKI	0	0.659351
RC3H2	AT	SYNCRIP	0	0.578155
RC3H2	AT	HNRNPU	0	0.526631
RC3H2	AT	RBFOX2	0	0.617747
RC3H2	AT	KHDRBS1	0	0.56861
RC3H2	AT	QKI	0	-0.570227
RC3H2	AT	SYNCRIP	0	-0.509529
RC3H2	AT	RBFOX2	0	-0.567047
RC3H2	AT	KHDRBS1	0	-0.527668
CRB2	AT	QKI	0	-0.501551
PSMB7	AT	QKI	0	0.550361
PSMB7	AT	RBFOX2	0	0.575908
PSMB7	AT	QKI	0	-0.550361
PSMB7	AT	RBFOX2	0	-0.575908
ZBTB43	AP	HNRNPF	0	-0.508873
ZBTB43	AP	HNRNPH2	0	-0.511537
ZBTB43	AP	HNRNPF	0	0.508873
ZBTB43	AP	HNRNPH2	0	0.511537
RAPGEF1	AP	NOVA2	0	0.708353
RAPGEF1	AP	NOVA2	0	-0.682238
MID1	AP	NOVA2	0	0.593385
PRRG1	AT	QKI	0	-0.604685
PRRG1	AT	SYNCRIP	0	-0.514226
PRRG1	AT	RBFOX2	0	-0.518455
PRRG1	AT	HNRNPH2	0	-0.503849
PRRG1	AT	KHDRBS1	0	-0.533376
PRRG1	AT	HNRNPLL	0	-0.503793
PRRG1	AT	QKI	0	0.604704
PRRG1	AT	SYNCRIP	0	0.514238
PRRG1	AT	RBFOX2	0	0.518465
PRRG1	AT	HNRNPH2	0	0.503867
PRRG1	AT	KHDRBS1	0	0.533383
PRRG1	AT	HNRNPLL	0	0.503813
CASK	ES	QKI	0	0.50874
UBA1	AP	HNRNPH2	0	0.517623
UBA1	AP	HNRNPA0	0	0.515163
FAM120C	AT	QKI	0	-0.529047
FAM120C	AT	QKI	0	0.529047
SPIN3	AT	QKI	0	-0.529777
SPIN3	AT	FMR1	0	-0.543742
SPIN3	AT	HNRNPU	0	-0.503137
SPIN3	AT	RBFOX2	0	-0.557905
SPIN3	AT	SF1	0	-0.520061
SPIN3	AT	HNRNPH2	0	-0.50117
SPIN3	AT	QKI	0	0.529754
SPIN3	AT	FMR1	0	0.54372
SPIN3	AT	HNRNPU	0	0.503123
SPIN3	AT	RBFOX2	0	0.557886
SPIN3	AT	SF1	0	0.520041
SPIN3	AT	HNRNPH2	0	0.501162
ZC4H2	ES	QKI	0	-0.500367
ALG13	ES	NOVA2	0	-0.535182
PLS3	ES	QKI	0	-0.520433
STAG2	AP	QKI	0	-0.544972
STAG2	AP	RBFOX2	0	-0.525375
STAG2	AP	QKI	0	0.576583
STAG2	AP	SYNCRIP	0	0.506307
STAG2	AP	RBFOX2	0	0.540272
STAG2	AP	KHDRBS1	0	0.517519
IDS	AT	QKI	0	0.571837
IDS	AT	SYNCRIP	0	0.51056
IDS	AT	HNRNPU	0	0.538521
IDS	AT	RBFOX2	0	0.50164
IDS	AT	KHDRBS1	0	0.58584
IDS	AT	QKI	0	-0.582201
IDS	AT	SYNCRIP	0	-0.517376
IDS	AT	HNRNPU	0	-0.525057
IDS	AT	RBFOX2	0	-0.603744
IDS	AT	SF1	0	-0.521796
IDS	AT	HNRNPH3	0	-0.5307
IDS	AT	RBMX	0	-0.514707
IDS	AT	KHDRBS1	0	-0.54588
CXorf40A	AT	RBFOX2	0	-0.515142
CXorf40A	AT	SF1	0	-0.520839
CXorf40A	AT	RBFOX2	0	0.515142
CXorf40A	AT	SF1	0	0.520839
SSR4	AP	SF1	0	-0.501799
SULT1A4	AP	RBFOX2	0	0.544284
SULT1A4	AP	NOVA2	0	0.533267
KCNK9	AT	PCBP1	0	0.50686
KCNK9	AT	PCBP1	0	-0.507195
